# Supplementary material for: Effects of Elevated CO2 Concentration on Host Adaptability and Chlorantraniliprole Susceptibility in Spodoptera frugiperda
Source: MDPI journal article supplement (doi:10.3390/insects13111029), 2022-11-07
Supplement: s1 [file s1]

**Effects of Elevated CO<sub>2</sub> Concentration on Host Adaptability and  
Chlorantraniliprole Susceptibility in *Spodoptera frugiperda***

**Supplement Table S1**

Primers of detoxification enzyme genes used in the quantitative real-time PCR.

| Identification | Primer Sequence (5' → 3') |                       |
|----------------|---------------------------|-----------------------|
|                | Forward                   | Reverse               |
| RPL10-insects  | TGGGTAAGAAGAAGGCTACG      | TGTTGATGCGGATGACAT    |
| RPL13-JIA      | GCCTTAACCCTGCTTTTGCTAG    | GCTTCGCCCTTCAATACCTTC |
| CYP-19543      | TGCCGCACCTACCACCAAA       | TGCCCAAGTAAGAGCCAACG  |
| CYP-17259      | CTTACGCCTTTGTTCTCATCCG    | CGTCAGGGCTCGCACTTCA   |
| CYP-05919      | ATGGCAAGTACGAATGGTGGA     | CGGCTATCAGGCGAAAGAAA  |
| CYP-22092      | TGTTTCGTGTTCTTCGCTGCTG    | TCTCCTCCTGCGCCTTCCT   |
| CYP-10853      | GAAGTGTTTCAGTGATCGTGGCG   | AAACCGATTCCTCAAGGCTGT |
| CE-12593       | AATGCCGAATCCTTGTCGG       | TGATGATGGCTTCAGGGTGG  |

|           |                         |                         |
|-----------|-------------------------|-------------------------|
| CE-20560  | ACGACGAATGGCGGGAAGT     | GGTGCCGTGGCGTAAGGTAT    |
| CE-13095  | TTCGTTACGGTCAACCACCC    | GCTGCCTTCCACAACATCTAAAA |
| CE-21185  | ACCTGTGCCTGAAGGGTCG     | GTTGTTTGGGTGGTGGTGTG    |
| CE-12962- | AGATAGCATTCTGTTTGGACCCG | CCCAGCGATATGAGGCAGTTTT  |
| ABC-01998 | GCATCGCAGGTTAGGACAC     | TTCACAGCAAACGGGCACAG    |
| ABC-02885 | ACCTCATAGCACGATCACC     | AAACGGCTTCCTTTACTGA     |
| ABC-18240 | AATGTCCACCCGTTTCTAC     | TACTAACCATCGCACTGAC     |
| ABC-22158 | GAACGAGCATTTCGACGACAAT  | CGGCAAACCAGCTAACATCAG   |
| UGT-18136 | CCATTGCTCTACCCAGGGATT   | TGGCACATCTGGTCCAAACA    |
| UGT-17742 | AAAAGGCAACCCTACCCAT     | CTTAGCGGCCAGTTCACAA     |

### Supplement Table S2

Toxicity effect of Chlorantraniliprole on 3<sup>rd</sup> larvae of *S.frugiperda* under elevated CO<sub>2</sub> and ambient CO<sub>2</sub>.

| Treatment                     | Concentration response regression equation | $\chi^2$ | <i>P</i> | LC <sub>50</sub> (mg L <sup>-1</sup> ) 95% CI |
|-------------------------------|--------------------------------------------|----------|----------|-----------------------------------------------|
| F <sub>A</sub> W <sub>A</sub> | y=4.2826+0.7447x                           | 51.9652  | 0.0001   | 9.19 (1.57 - 59.67)                           |
| F <sub>E</sub> W <sub>A</sub> | y=4.4479+0.7901x                           | 39.6400  | 0.0001   | 5.00(0.32 - 9.55)                             |

Note: 95% CI, 95% confident intervals; LC<sub>50</sub>, the concentration of Chlorantraniliprole.

### Supplement Table S3

Summary of the transcriptome sequencing data.

| Sample                           | Total Reads (M) | Clean Reads (M) | Clean Reads Q20 (%) | Clean Reads Q30 (%) | Clean Reads Ratio (%) | Total Reads Mapping (%) |
|----------------------------------|-----------------|-----------------|---------------------|---------------------|-----------------------|-------------------------|
| F <sub>A</sub> W <sub>A</sub> _1 | 41.99           |                 | 97.1                | 92.59               | 95.83                 | 69.25                   |
| F <sub>A</sub> W <sub>A</sub> _2 | 42.37           |                 | 97.18               | 92.7                | 95.66                 | 69.03                   |
| F <sub>A</sub> W <sub>A</sub> _3 | 42.47           |                 | 97.13               | 92.56               | 96.92                 | 67.51                   |
| F <sub>E</sub> W <sub>E</sub> _1 | 42.3            |                 | 97.16               | 92.62               | 96.52                 | 67.28                   |
| F <sub>E</sub> W <sub>E</sub> _2 | 42.18           |                 | 97.29               | 92.95               | 96.25                 | 68.49                   |
| F <sub>E</sub> W <sub>E</sub> _3 | 42.39           |                 | 97.25               | 92.81               | 96.74                 | 67.25                   |

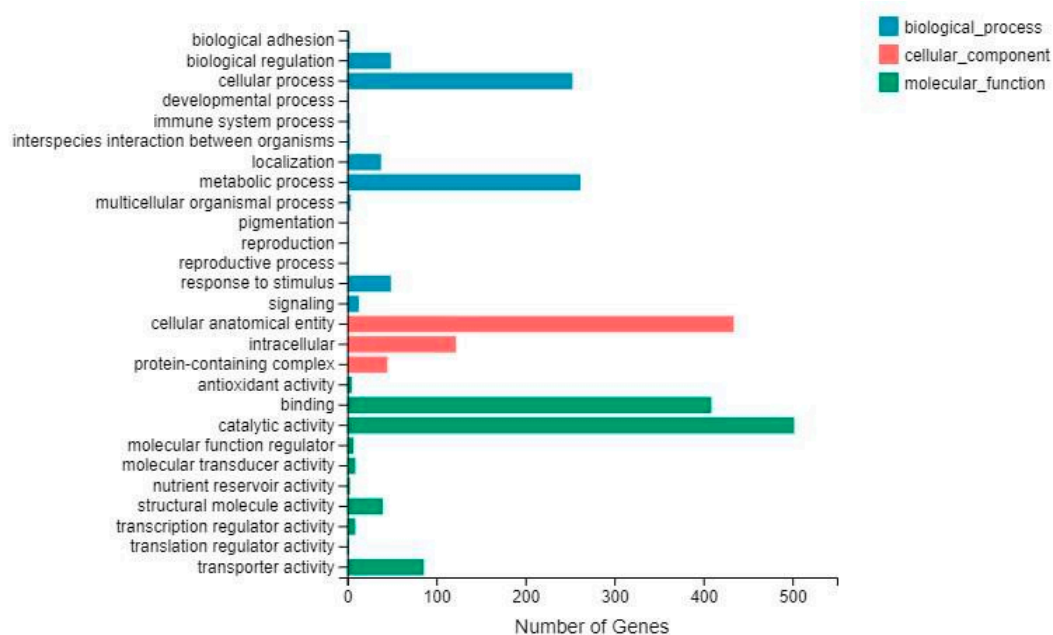

**Supplement Figure S1.** GO gene function classifications of DEGs in comparison groups.

Gene function classifications of DEGs in  $F_{AWA}$  versus  $F_{EWE}$ . Note: The X-axis represents the number of genes annotated to GO entries and the Y-axis represents the GO functional classification.

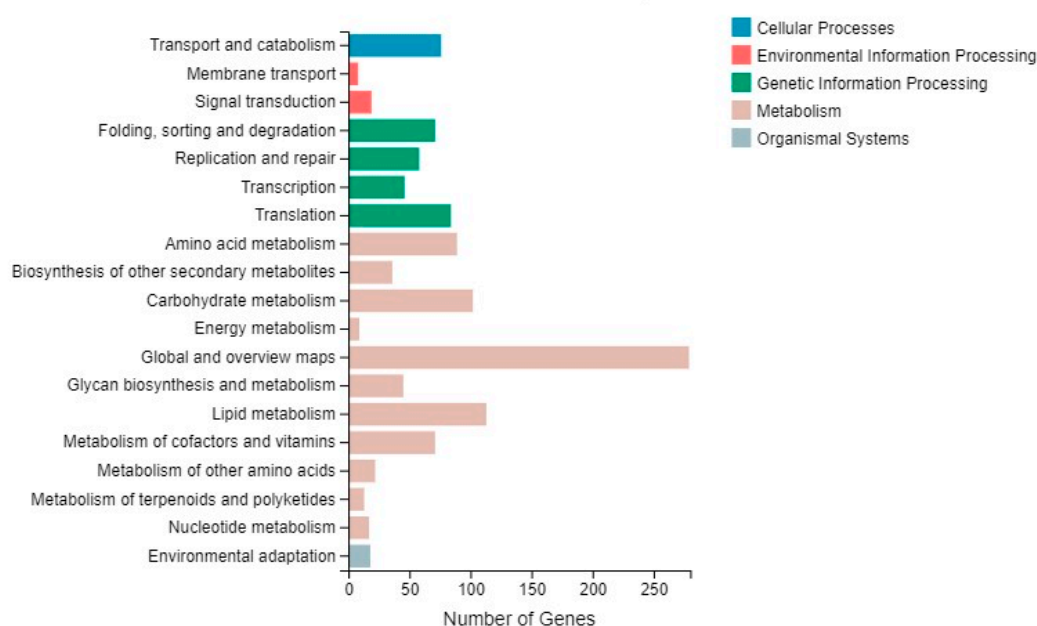

**Supplement Figure S2.** KEGG gene function classifications of DEGs in comparison groups.

Gene function classifications of DEGs in  $F_{AWA}$  versus  $F_{EWE}$ . **Note:** X-axis is the number of genes annotated to a particular KEGG Pathway category and Y-axis is the KEGG Pathway category.
